# Supplementary material for: Single, Repeated, and Maintenance Ketamine Infusions for Treatment-Resistant Depression: A Randomized Controlled Trial
Source: Atypon-hosted journal article supplement (doi:10.1176/appi.ajp.2018.18070834), 2019-03-29
Supplement: appi.ajp.2018.18070834.ds001.pdf [file appi.ajp.2018.18070834.ds001.pdf]

 


Psychiatry Online
